# Supplementary material
Source: PubMed Central journal article supplement (PMC6844272)
Supplement: MD-010-C9MD00227H-s001.pdf [file MD-010-C9MD00227H-s001.pdf]

**Supporting Information**

**A cell-based screening system for RNA Polymerase I  
inhibitors**

Xiao Tan,<sup>†</sup> & Samuel G. Awuah<sup>\*,†</sup>

<sup>†</sup> Department of Chemistry, University of Kentucky in Lexington, 505 Rose Street., Lexington,  
Kentucky 40506, United States.

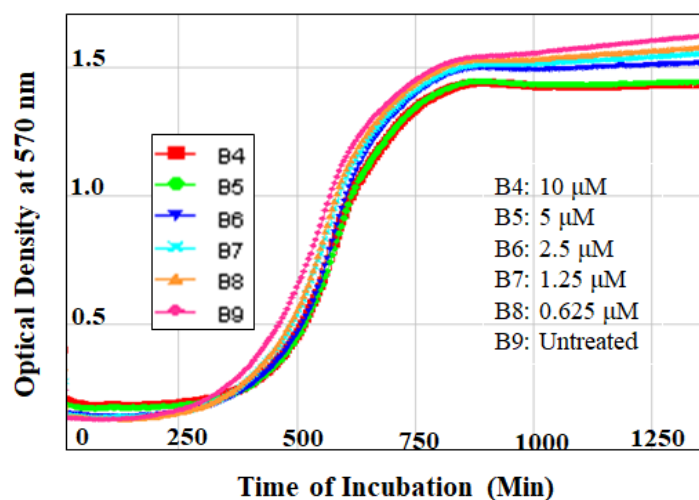

Figure S1. Dose-dependent treatment of yeast YBR140C-HmrDNA using actinomycin D.

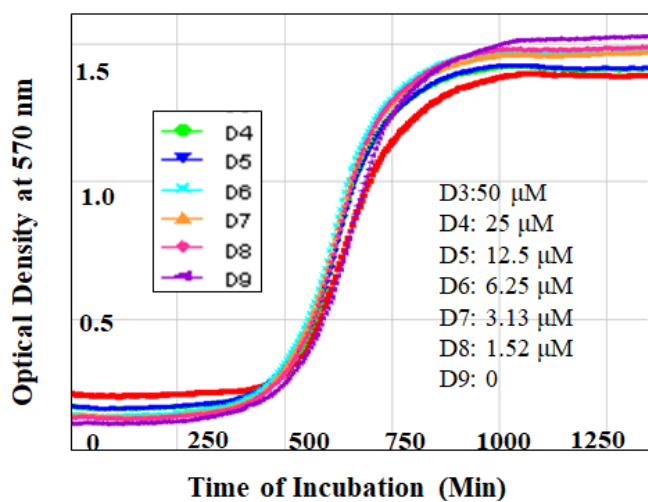

Figure S2. Dose-dependent treatment of yeast YBR140C-HmrDNA using acebutolol hydrochloride.

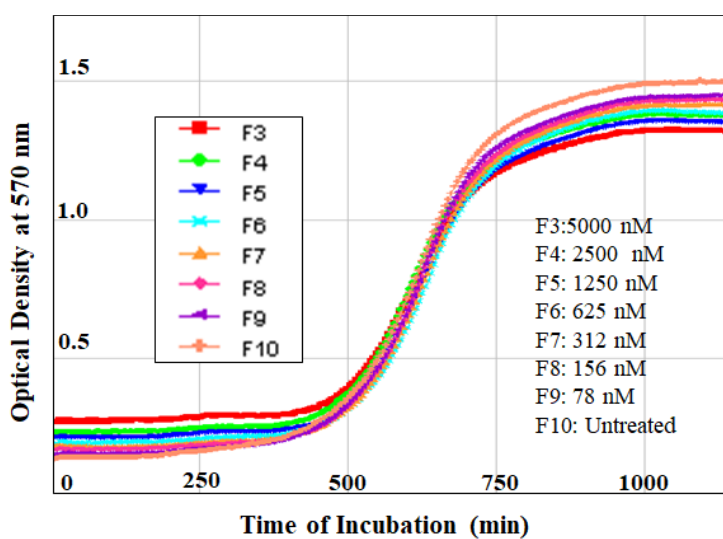

Figure S3. Dose-dependent treatment of yeast YBR140C-HmrDNA using agartroban.

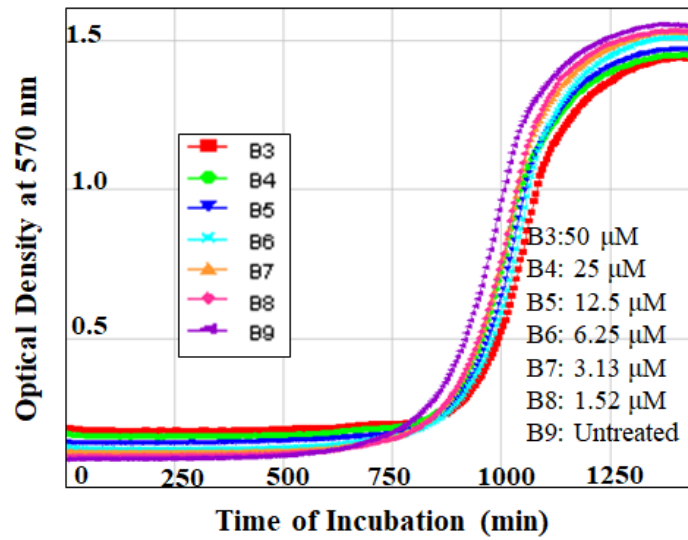

Figure S4. Dose-dependent treatment of yeast YBR140C-HmrDNA using aripirazole.

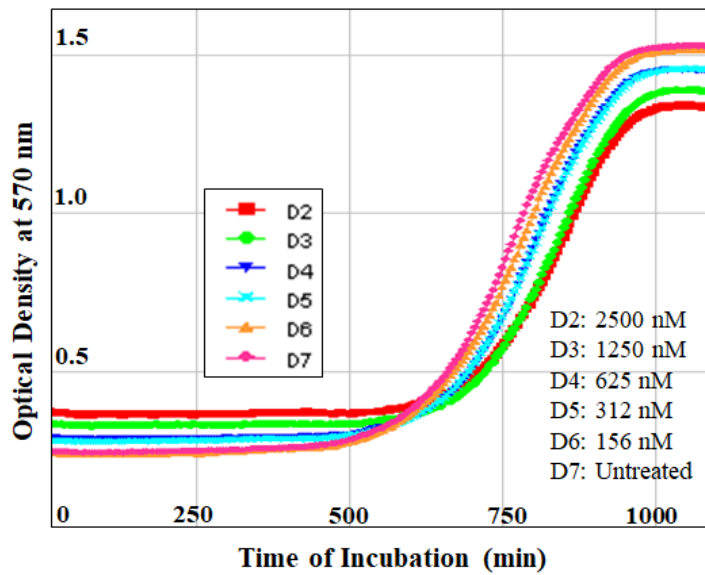

Figure S5. Dose-dependent treatment of yeast YBR140C-HmrDNA using bisoprolol.

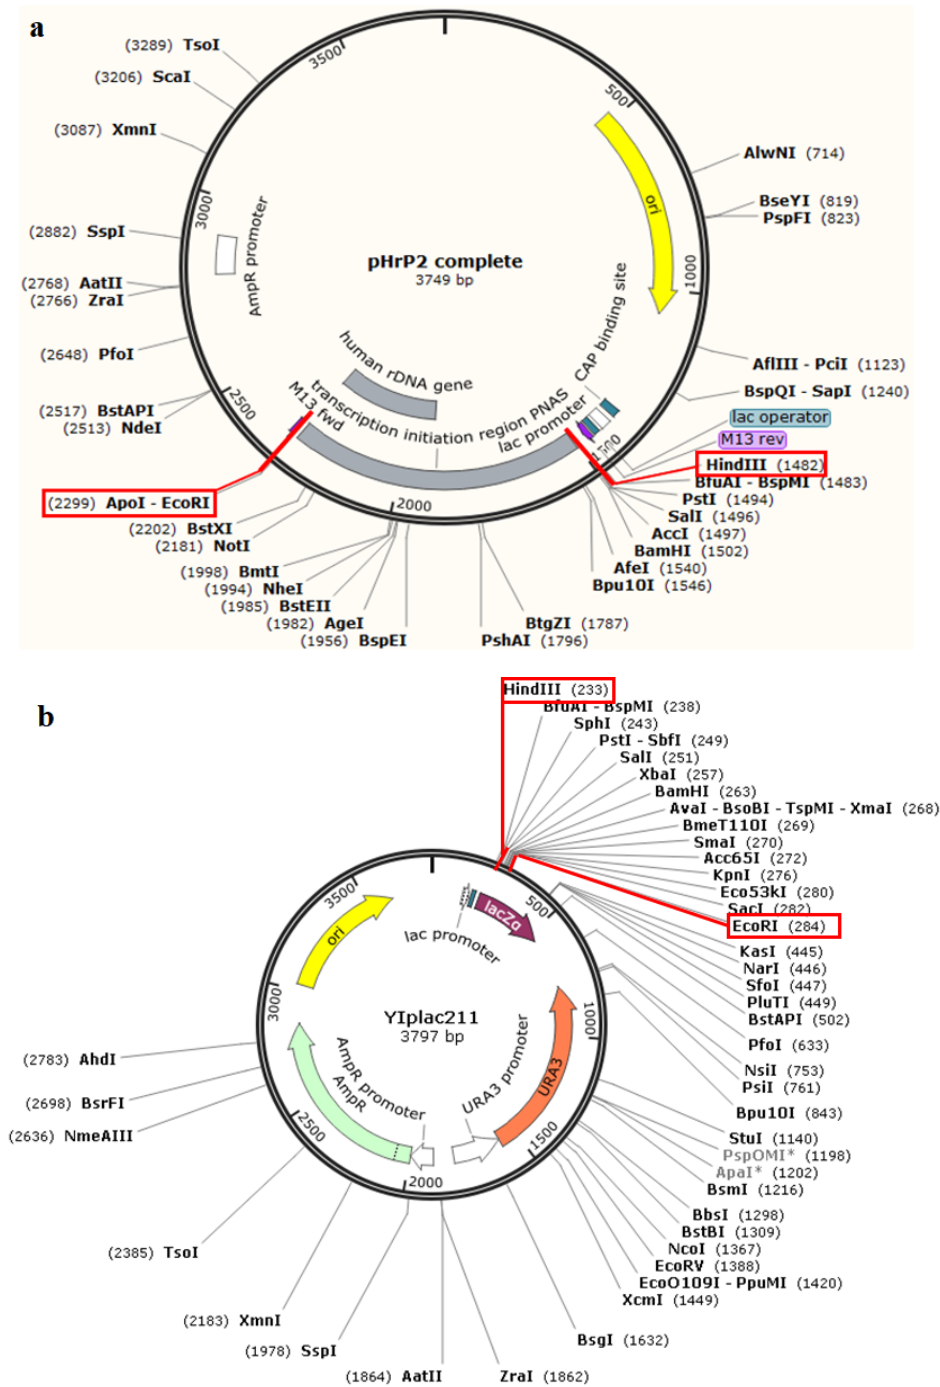

**Figure S6.** Plasmid Maps of pHrP2 (a) and YIplac211-TG-1 (b). Red boxes were used to highlight the two restriction endonucleases of HindIII and EcoRI that were used to cut out the insert as well as to linearize the vector plasmid with matching sticky. The thickened red threads were used to depict the positions at which the restriction endonucleases cut. **A.** Plasmid map of pHrP2, the source of Human rDNA plus the promoter. **B.** Plasmid map of YIplac211-TG1, the vector plasmids that was used to carry the insert and to transform yeast cells.

**AAGCTTGGCTGCAGGTCGACGGATCCTTTCTGGCGAGTCCCCGTGCGGAGTCGGAGAGCGCTC**  
**CCTGAGCGCGCTGCGGCCCGAGAGGTGCGCCTGGCCGGCCTTCGGTCCCTCGTGTGTCCC**  
**TCGTAGGAGGGGCCGCGCCGAAAATGCTTCCGGCTCCCGCTCTGGAGACACGGGCCGGCCCCCT**  
**GCGTGTGGCACGGGCGGCCGGAGGGCGTCCCCGGCCCGCGCTGCTCCCGCGTGTGTCTGG**  
**GGTTGACCAGAGGGCCCCGGGCGCTCCGTGTGTGGCTGCGATGGTGGCGTTTTTGGGGACAGGT**  
**GTCCGTGTGCGCGTGCCTGGGCCGGCGGCGTGGTTCGGTACGCGACCTCCCGGCCCGGGG**  
**GAGGTATAICTTTCGCTCCGAGTCGGCATTGTTGGGCCCGGGTTATTGCTGACACGCTGTCTCT**  
**GCGACCTGTCGCTGGAGAGGTTGGCCCTCCGGATGCGCGCGGGGCTCTGGCCTACCGGTGACC**  
**CGGCTAGCCGGCCGCGCTCCTGCTTGAAGCCGCTGCCGGGCCCGCGGGCCTGCTGTTCTCTCG**  
**CGCGTCCGAGCGTCCCGACTCCCGGTGCCGGGCCGGTCCGGGTCTCTGACCCACCCGGGGGG**  
**CGGCGGGGAAGGCGGCGAGGGCCACCGTGCCCCGTGCGCTCTCCGCTGCGGGCGCCCGGGG**  
**GGCCGCGACAACCCACCCCGCTGGCTCCGTGCCGTGCGTGTGAGGCGTTCGCTCTCCGCGGG**  
**GTTGTCCGCCGCCCTTCCCCGGAGTGGGGGTTGGCCGGAGCCGATCCCCGGGAATTC**

**Figure S7.** Sequence of insert containing human rDNA plus promoter. The sequence was shown from 5' terminus to 3' terminus that contained human rDNA plus promoter (underscored) and had the sticky ends in bold alphabets.

|                                                                    |                                                                                                                                       |
|--------------------------------------------------------------------|---------------------------------------------------------------------------------------------------------------------------------------|
| Note2P124rDNAIIP_pHrP2PromoterFWD<br>pHrP2-HumanrDNA-plus-promoter | -----CTCNAGCGCGTGCGGC<br>GATCCTTCTGGCGAGTCCCCGTGCGGAGTCGGAGAGCGCTCCCTGAGCGCGTGCGGC<br>* * *****                                       |
| Note2P124rDNAIIP_pHrP2PromoterFWD<br>pHrP2-HumanrDNA-plus-promoter | CCGAGAGGTGCGCCTGGCCGGCCTTCGGTCCCTCGTGTGTCCCGGTCTAGGAGGGGCC<br>CCGAGAGGTGCGCCTGGCCGGCCTTCGGTCCCTCGTGTGTCCCGGTCTAGGAGGGGCC<br>*****     |
| Note2P124rDNAIIP_pHrP2PromoterFWD<br>pHrP2-HumanrDNA-plus-promoter | GGCCGAAAATGCTTCCGGCTCCCGCTCTGGAGACACGGGCCGGCCCTGCGTGTGGCAC<br>GGCCGAAAATGCTTCCGGCTCCCGCTCTGGAGACACGGGCCGGCCCTGCGTGTGGCAC<br>*****     |
| Note2P124rDNAIIP_pHrP2PromoterFWD<br>pHrP2-HumanrDNA-plus-promoter | GGCGGCCGGGAGGGCGTCCCCGGCCCGCGCTGCTCCCGGTGTGTCTGGGGTTGACC<br>GGCGGCCGGGAGGGCGTCCCCGGCCCGCGCTGCTCCCGGTGTGTCTGGGGTTGACC<br>*****         |
| Note2P124rDNAIIP_pHrP2PromoterFWD<br>pHrP2-HumanrDNA-plus-promoter | AGAGGGCCCCGGCGCTCCCGTGTGTGGTGCATGGTGGCGTTTTTGGGGACAGGTGTCC<br>AGAGGGCCCCGGCGCTCCCGTGTGTGGTGCATGGTGGCGTTTTTGGGGACAGGTGTCC<br>*****     |
| Note2P124rDNAIIP_pHrP2PromoterFWD<br>pHrP2-HumanrDNA-plus-promoter | GTGTGCGCGTGCCTGGCCGGCGCGTGGTGGTACGCGACCTCCCGGCCCGGGGG<br>GTGTGCGCGTGCCTGGCCGGCGCGTGGTGGTACGCGACCTCCCGGCCCGGGGG<br>*****               |
| Note2P124rDNAIIP_pHrP2PromoterFWD<br>pHrP2-HumanrDNA-plus-promoter | AGGTATAICTTTCGCTCCGAGTCGGCATTGTTGGGCCCGGGTTATTGCTGACACGCTGT<br>AGGTATAICTTTCGCTCCGAGTCGGCATTGTTGGGCCCGGGTTATTGCTGACACGCTGT<br>*****   |
| Note2P124rDNAIIP_pHrP2PromoterFWD<br>pHrP2-HumanrDNA-plus-promoter | CCTCTGGCGACCTGTCGCTGGAGAGGTTGGCCCTCCGGATGCGCGCGGGGCTCTGGCCTA<br>CCTCTGGCGACCTGTCGCTGGAGAGGTTGGCCCTCCGGATGCGCGCGGGGCTCTGGCCTA<br>***** |
| Note2P124rDNAIIP_pHrP2PromoterFWD<br>pHrP2-HumanrDNA-plus-promoter | CCGGTGACCCGGTAGCCGGCCGCGCTCCTGCTTGAAGCCGCTGCCGGGCCCGGGGCC<br>CCGGTGACCCGGTAGCCGGCCGCGCTCCTGCTTGAAGCCGCTGCCGGGCCCGGGGCC<br>*****       |

**Figure S8.** Sequence alignment of rDNA plus promoter of YIPlac211-TG1-HmrDNA and pHrP2 plasmids



GTCACAGAAAAGCATCTTACGGATGGCATGACAGTAAGAGAATTATGCAGTGCTGCCATAACCAT  
GAGTGATAAACAACACTGCGGCCAACTTACTTCTGACAACGATCGGAGGACCGAAGGAGCTAACCGCT  
TTTTTGCACAACATGGGGGATCATGTAACCTCGCCTTGATCGTTGGGAACCGGAGCTGAATGAAGC  
CATAACAAACGACGAGCGTGACACCACGATGCCTGTAGCAATGGCAACAACGTTGCGCAAACCTA  
TTAACTGGCGAACTACTTACTCTAGCTTCCCGGCAACAATTAATAGACTGGATGGAGGCGGATAA  
AGTTGCAGGACCACTTCTGCGCTCGGCCCTCCGGCTGGCTGGTTTATTGCTGATAAATCTGGAG  
CCGGTGAGCGTGGGTCTCGCGGTATCATTGCAGCACTGGGGCCAGATGGTAAGCCCTCCCGTATC  
GTAGTTATCTACAGACGGGGAGTCAGGCAACTATGGATGAACGAAATAGACAGATCGCTGAGA  
TAGGTGCCTCACTGATTAAGCATTGGTAACTGTCAGACCAAGTTTACTCATATATACTTTAGATTG  
ATTTAAAACCTCATTTTTAATTTAAAAGGATCTAGGTGAAGATCCTTTTTTGATAATCTCATGACCAA  
AATCCCTAACGTGAGTTTTTCGTTCCACTGAGCGTCAGACCCCGTAGAAAAGATCAAAGGATCTT  
CTTGAGATCCTTTTTTTCTGCGCGTAATCTGCTGCTTGCAAACAAAAAAACCACCGCTACCAGCG  
GTGGTTTGTGGCCGGATCAAGAGCTACCAACTCTTTTTCCGAAGGTAACGGCTTCAGCAGAG  
CGCAGATAACAAATACTGTTCTTCTAGTGTAGCCGTAGTTAGGCCACCACTTCAAGAACTCTGTA  
GCACCGCCTACATACCTCGCTCTGCTAATCCTGTTACCAGTGGCTGCTGCCAGTGGCGATAAGTC  
GTGTCTTACCGGGTTGGACTCAAGACGATAGTTACCGGATAAGGCGCAGCGGTGCGGGCTGAACG  
GGGGTTCGTGCACACAGCCCAGCTTGGAGCGAACGACCTACACCGAACTGAGATACCTACAG  
CGTGAGCTATGAGAAAAGCGCCACGCTTCCCGAAGGGAGAAAAGGCGGACAGGTATCCGGTAAGC  
GGCAGGGTCGGAACAGGAGAGCGCACGAGGGAGCTTCCAGGGGGAAACGCCTGGTATCTTTAT  
AGTCCCTGTCGGGTTTCGCCACCTCTGACTTGAGCGTCGATTTTTGTGATGCTCGTCAGGGGGGCG  
GAGCCTATGGAAAACGCCAGCAACGCGGCCTTTTTACGGTTCCTGGCCTTTTGCTGGCCTTTTG  
CTCACATGTTCTTTCCTGCGTTATCCCCTGATTCTGTGGATAACCGTATTACCGCCTTTGAGTGAG  
CTGATACCGCTCGCCGAGCCGAACGACCGAGCGCAGCGAGTCAGTGAGCGAGGAAGCGGAAG  
AGCGCCCAATACGCAAACCGCCTCTCCCCGCGGTTGGCCGATTCATTAATGCAGCTGGCACGA  
CAGGTTTCCCGACTGGAAAGCGGGCAGTGAGCGCAACGCAATTAATGTGAGTTAGCTCACTCAT  
TAGGCACCCCAGGCTTTACACTTTATGCTTCCGGCTCGTATGTTGTGTGGAATTGTGAGCGGATAA  
CAATTTACACAGGAAACAGCTATGACCATGATTACGCCA**AGCTT**

**Figure S10.** Sequence of vector template from the yeast integrative plasmid of YIPlac211-TG1. The sequence was shown from 5' end to 3' end with sticky ends in bold alphabets.

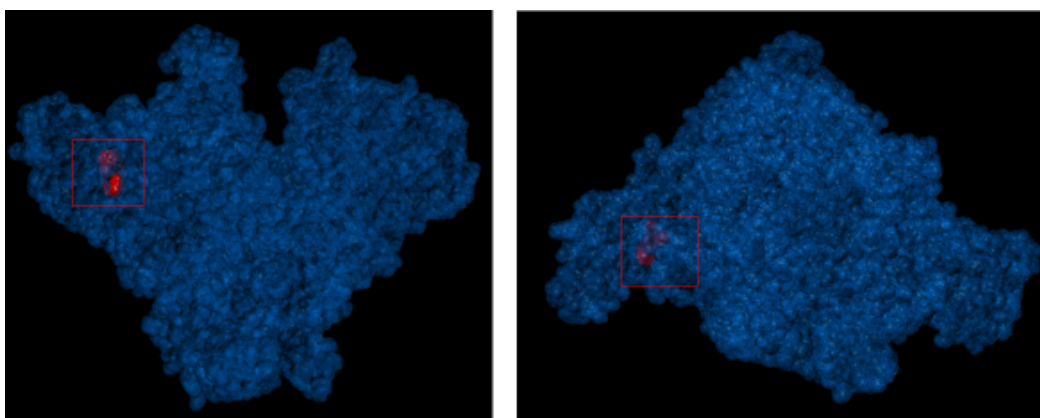

**Figure S11.** Docking Protomol for Screening Small Compounds from NCATS small-molecule library.

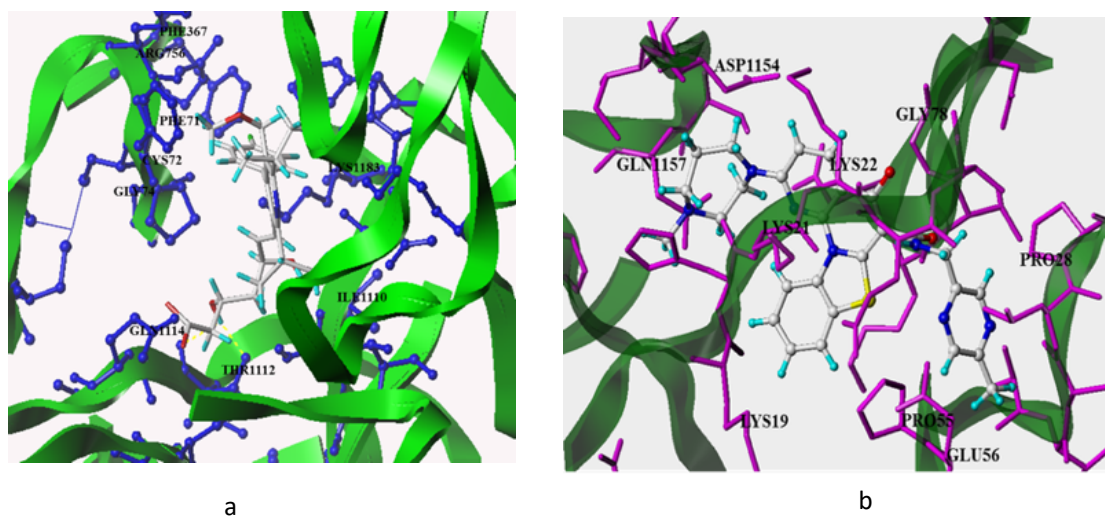

**Figure S12.** a. Interaction between cerivastatin sodium at the interface of RNA Pol I with RRN3. b. Interaction between CX-5461 at the interface of RNA Pol I with RRN3. The images were exported from results of virtual screening done by SYBYL-X.
